# Supplementary material for: Genotypic and Phenotypic Diversity of Kluyveromyces marxianus Isolates Obtained from the Elaboration Process of Two Traditional Mexican Alcoholic Beverages Derived from Agave: Pulque and Henequen (Agave fourcroydes) Mezcal
Source: MDPI journal article supplement (doi:10.3390/jof9080795), 2023-07-28
Supplement: s1 [file s1]

|            |   |   |   |   |   |   |   |   |           |
|------------|---|---|---|---|---|---|---|---|-----------|
| L-Lysine   | + | + | + | + | + | + | + | + | +         |
| Cadaverine | - | + | + | + | + | + | + | + | +         |
| Creatine   | - | - | - | - | - | - | - | - | <b>nd</b> |
| Creatinine | - | - | - | - | - | - | - | - | <b>nd</b> |

+ positive; - negative; **w** weak, d delayed, **v** variable: positive response; **nd** non determined.

Lachance, M.A. *Kluyveromyces van Der Walt* (1971). In *The Yeasts*; Kurtzman, C.P., Fell, J.W., Boekhout, T., Eds.; Elsevier: Amsterdam, The Netherlands, 2011; Volume 2, pp. 471–481, ISBN 9780444521491.

Barnett, J.A.; Payne, R.W.; Yarrow, D.; Barnett, L. *Yeasts: Characteristics and Identification*; Cambridge University Press: Cambridge, UK, 2000; ISBN 9780521573962.
